# Supplementary material for: Rapid assembly of complex cyclopentanes employing chiral, α,β-unsaturated acylammonium intermediates
Source: Springer Nature journal article supplement (doi:10.1038/nchem.1788), 2013-11-03
Supplement: 41557_2013_BFnchem1788_MOESM146_ESM.mol [file 41557_2013_BFnchem1788_MOESM146_ESM.mol]

nchem.1788-comp24-minus.cdx
  ChemDraw10301310102D

 51 55  0  0  0  0  0  0  0  0999 V2000
   -0.4413    0.1521    0.0000 C   0  0  0  0  0  0  0  0  0  0  0  0
    0.2276    0.5793    0.0000 C   0  0  0  0  0  0  0  0  0  0  0  0
   -0.4058   -0.6409    0.0000 C   0  0  0  0  0  0  0  0  0  0  0  0
    0.2987   -1.0066    0.0000 C   0  0  0  0  0  0  0  0  0  0  0  0
    0.9676   -0.5793    0.0000 C   0  0  0  0  0  0  0  0  0  0  0  0
    0.9321    0.2136    0.0000 C   0  0  0  0  0  0  0  0  0  0  0  0
   -0.2847   -1.5899    0.0000 C   0  0  0  0  0  0  0  0  0  0  0  0
    0.7684   -1.7769    0.0000 C   0  0  0  0  0  0  0  0  0  0  0  0
    1.7047    0.5131    0.0000 C   0  0  0  0  0  0  0  0  0  0  0  0
    0.6806    1.2423    0.0000 O   0  0  0  0  0  0  0  0  0  0  0  0
    2.5016    0.2995    0.0000 O   0  0  0  0  0  0  0  0  0  0  0  0
   -1.2702   -0.2275    0.0000 C   0  0  0  0  0  0  0  0  0  0  0  0
    0.0280    1.3475    0.0000 C   0  0  0  0  0  0  0  0  0  0  0  0
   -0.7643    1.3951    0.0000 C   0  0  0  0  0  0  0  0  0  0  0  0
   -1.0544    0.6562    0.0000 C   0  0  0  0  0  0  0  0  0  0  0  0
    1.7645   -0.7928    0.0000 C   0  0  0  0  0  0  0  0  0  0  0  0
    1.8483    1.4235    0.0000 N   0  0  0  0  0  0  0  0  0  0  0  0
    1.1316    2.0030    0.0000 C   0  0  0  0  0  0  0  0  0  0  0  0
    1.2752    2.9134    0.0000 C   0  0  0  0  0  0  0  0  0  0  0  0
    2.0452    3.2096    0.0000 C   0  0  0  0  0  0  0  0  0  0  0  0
    2.1737    4.0245    0.0000 C   0  0  0  0  0  0  0  0  0  0  0  0
    1.5322    4.5432    0.0000 C   0  0  0  0  0  0  0  0  0  0  0  0
    0.7622    4.2471    0.0000 C   0  0  0  0  0  0  0  0  0  0  0  0
    0.6337    3.4321    0.0000 C   0  0  0  0  0  0  0  0  0  0  0  0
    1.6607    5.3582    0.0000 Br  0  0  0  0  0  0  0  0  0  0  0  0
   -1.3476   -1.0461    0.0000 O   0  0  0  0  0  0  0  0  0  0  0  0
   -1.9405    0.2487    0.0000 O   0  0  0  0  0  0  0  0  0  0  0  0
   -2.6881   -0.0936    0.0000 C   0  0  0  0  0  0  0  0  0  0  0  0
   -3.3583    0.3827    0.0000 C   0  0  0  0  0  0  0  0  0  0  0  0
   -0.0718   -2.3841    0.0000 O   0  0  0  0  0  0  0  0  0  0  0  0
   -1.0789   -1.3771    0.0000 O   0  0  0  0  0  0  0  0  0  0  0  0
   -0.6552   -2.9675    0.0000 C   0  0  0  0  0  0  0  0  0  0  0  0
   -0.4417   -3.7644    0.0000 C   0  0  0  0  0  0  0  0  0  0  0  0
   -1.0250   -4.3478    0.0000 C   0  0  0  0  0  0  0  0  0  0  0  0
   -0.8115   -5.1446    0.0000 C   0  0  0  0  0  0  0  0  0  0  0  0
   -0.0146   -5.3582    0.0000 C   0  0  0  0  0  0  0  0  0  0  0  0
    0.5687   -4.7748    0.0000 C   0  0  0  0  0  0  0  0  0  0  0  0
    0.3552   -3.9779    0.0000 C   0  0  0  0  0  0  0  0  0  0  0  0
    1.5904   -1.7572    0.0000 O   0  0  0  0  0  0  0  0  0  0  0  0
    0.3744   -2.4986    0.0000 O   0  0  0  0  0  0  0  0  0  0  0  0
    0.7869   -3.2131    0.0000 C   0  0  0  0  0  0  0  0  0  0  0  0
    1.6119   -3.2131    0.0000 C   0  0  0  0  0  0  0  0  0  0  0  0
    2.0244   -3.9276    0.0000 C   0  0  0  0  0  0  0  0  0  0  0  0
    2.8494   -3.9276    0.0000 C   0  0  0  0  0  0  0  0  0  0  0  0
    3.2619   -3.2131    0.0000 C   0  0  0  0  0  0  0  0  0  0  0  0
    2.8494   -2.4986    0.0000 C   0  0  0  0  0  0  0  0  0  0  0  0
    2.0244   -2.4986    0.0000 C   0  0  0  0  0  0  0  0  0  0  0  0
    1.9781   -1.5897    0.0000 O   0  0  0  0  0  0  0  0  0  0  0  0
    2.7749   -1.8033    0.0000 C   0  0  0  0  0  0  0  0  0  0  0  0
    3.3583   -1.2199    0.0000 C   0  0  0  0  0  0  0  0  0  0  0  0
    2.3459   -0.2114    0.0000 O   0  0  0  0  0  0  0  0  0  0  0  0
  1  2  1  0      
  1  3  1  0      
  3  4  1  0      
  4  5  1  0      
  5  6  1  0      
  6  2  1  0      
  4  7  1  0      
  4  8  1  0      
  6  9  1  6      
  2 10  1  6      
  9 11  2  0      
  1 12  1  6      
  2 13  1  0      
 13 14  1  0      
 14 15  1  0      
 15  1  1  0      
  5 16  1  1      
 17  9  1  0      
 17 18  1  0      
 18 19  1  0      
 19 20  2  0      
 20 21  1  0      
 21 22  2  0      
 22 23  1  0      
 23 24  2  0      
 24 19  1  0      
 22 25  1  0      
 12 26  2  0      
 12 27  1  0      
 27 28  1  0      
 28 29  1  0      
  7 30  1  0      
  7 31  2  0      
 30 32  1  0      
 32 33  1  0      
 33 34  2  0      
 34 35  1  0      
 35 36  2  0      
 36 37  1  0      
 37 38  2  0      
 38 33  1  0      
  8 39  2  0      
  8 40  1  0      
 40 41  1  0      
 41 42  1  0      
 42 43  2  0      
 43 44  1  0      
 44 45  2  0      
 45 46  1  0      
 46 47  2  0      
 47 42  1  0      
 16 48  1  0      
 48 49  1  0      
 49 50  1  0      
 16 51  2  0      
M  END
